# Supplementary material for: Dorsal root ganglion macrophages contribute to both the initiation and persistence of neuropathic pain
Source: PubMed Central journal article supplement (PMC6959328; doi:10.1038/s41467-019-13839-2), 2020-01-14
Supplement: 41467_2019_13839_MOESM1_ESM.pdf [file 41467_2019_13839_MOESM1_ESM.pdf]

## SUPPLEMENTARY INFORMATION

Dorsal root ganglion macrophages contribute to both the initiation and persistence of neuropathic pain

Yu et al.

Figure S1

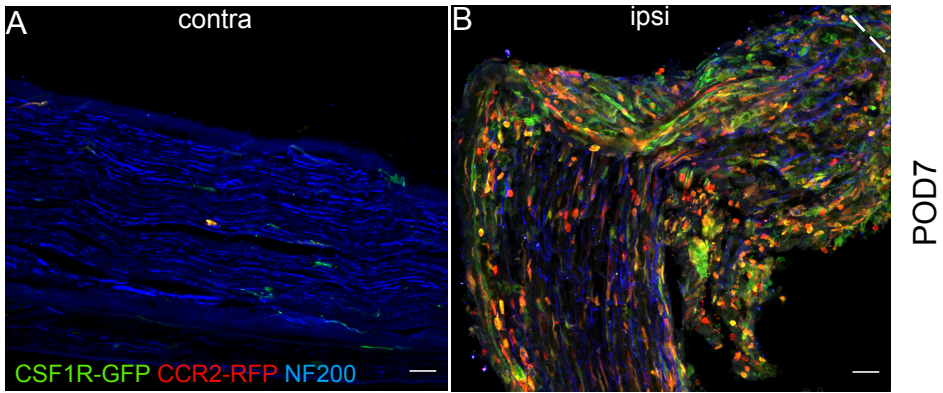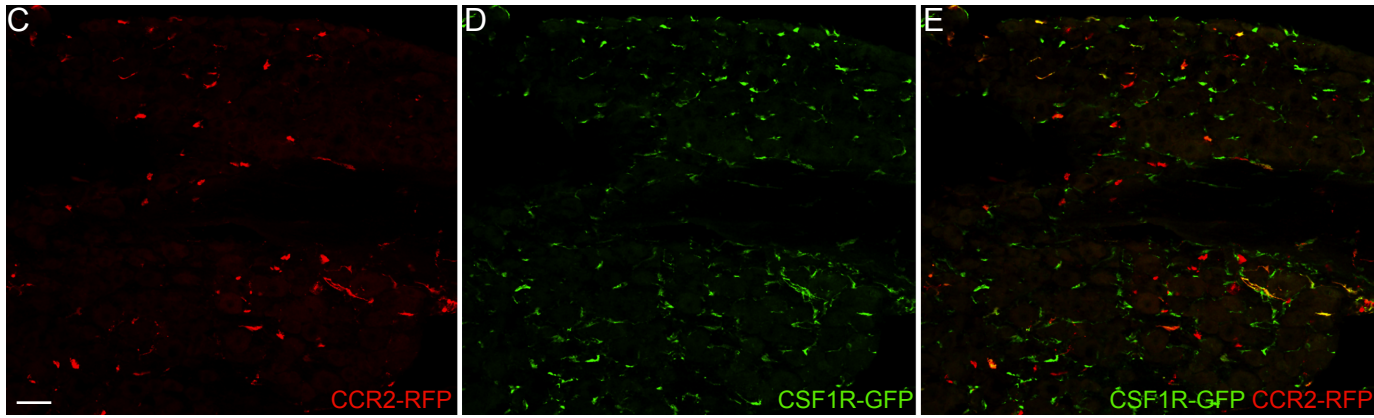

**Supplementary Figure 1: Macrophage distribution in peripheral nerve and DRG. (A-B)** Immunostaining of macrophages co-expressing CSF1R-GFP (green) and CCR2-RFP (red) in the sciatic nerve of a CSF1R-GFP<sup>+/-</sup>CCR2-RFP<sup>+/-</sup> mouse on POD7; contralateral (A) and ipsilateral (B) to the injury. Dashed line in upper right corner of B denotes ligature site; NF200 (blue) marks myelinated axons. Scale bar: 10 μm in A-B. **(C-E)** Immunostaining of macrophages co-expressing CSF1R-GFP (green) and CCR2-RFP (red) in the L4/L5 DRG of uninjured CSF1R-GFP<sup>+/-</sup>CCR2-RFP<sup>+/-</sup> mice. Scale bar: 50μm in C-E.

Figure S2

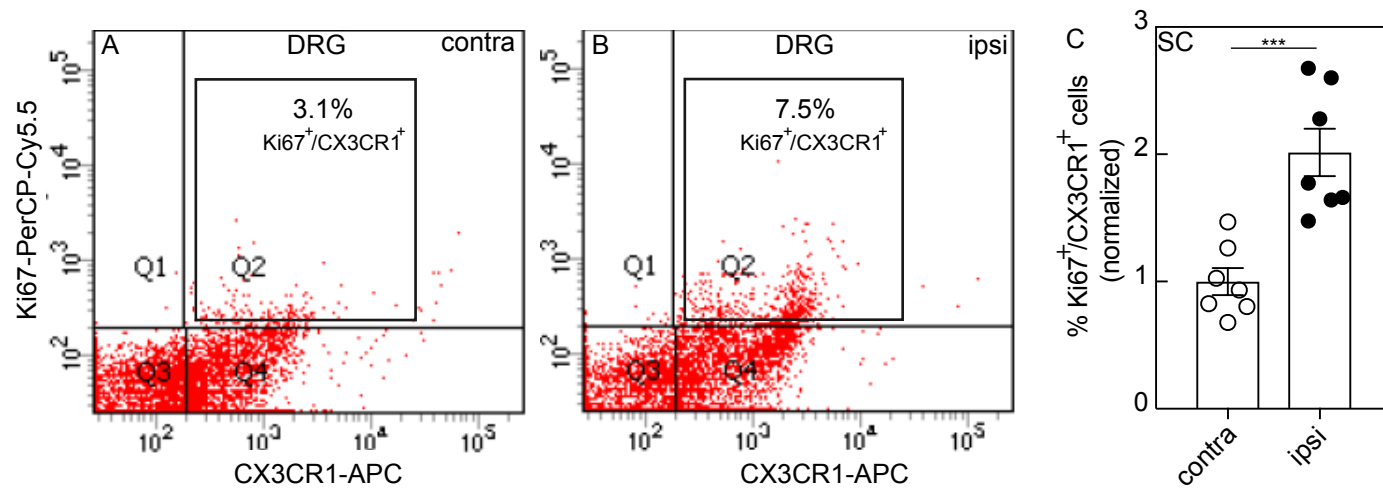

**Supplementary Figure 2. Proliferating CX3CR1<sup>+</sup> cells in the DRG and lumbar spinal cord of wild-type mice after SNI.** Dissociated cells were immunostained with CX3CR1-APC and Ki67-PerCp-Cy5.5 antibodies. **(A-B)** Representative FACS analysis of Ki67 expression in CX3CR1<sup>+</sup> macrophages in the contralateral (A) and ipsilateral (B) L4/L5 DRG 4 days after nerve injury (POD4). The percentage of gated cells are noted in the upper right quadrant. **(C)** FACS analysis of Ki67 expression in CX3CR1<sup>+</sup> lumbar spinal cord (SC) microglia on POD4 (n=7 per group). Data presented as mean  $\pm$  S.E.M. Student's *t*-test in C. \*\*\**P*<0.001.

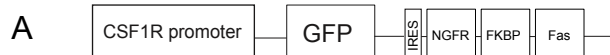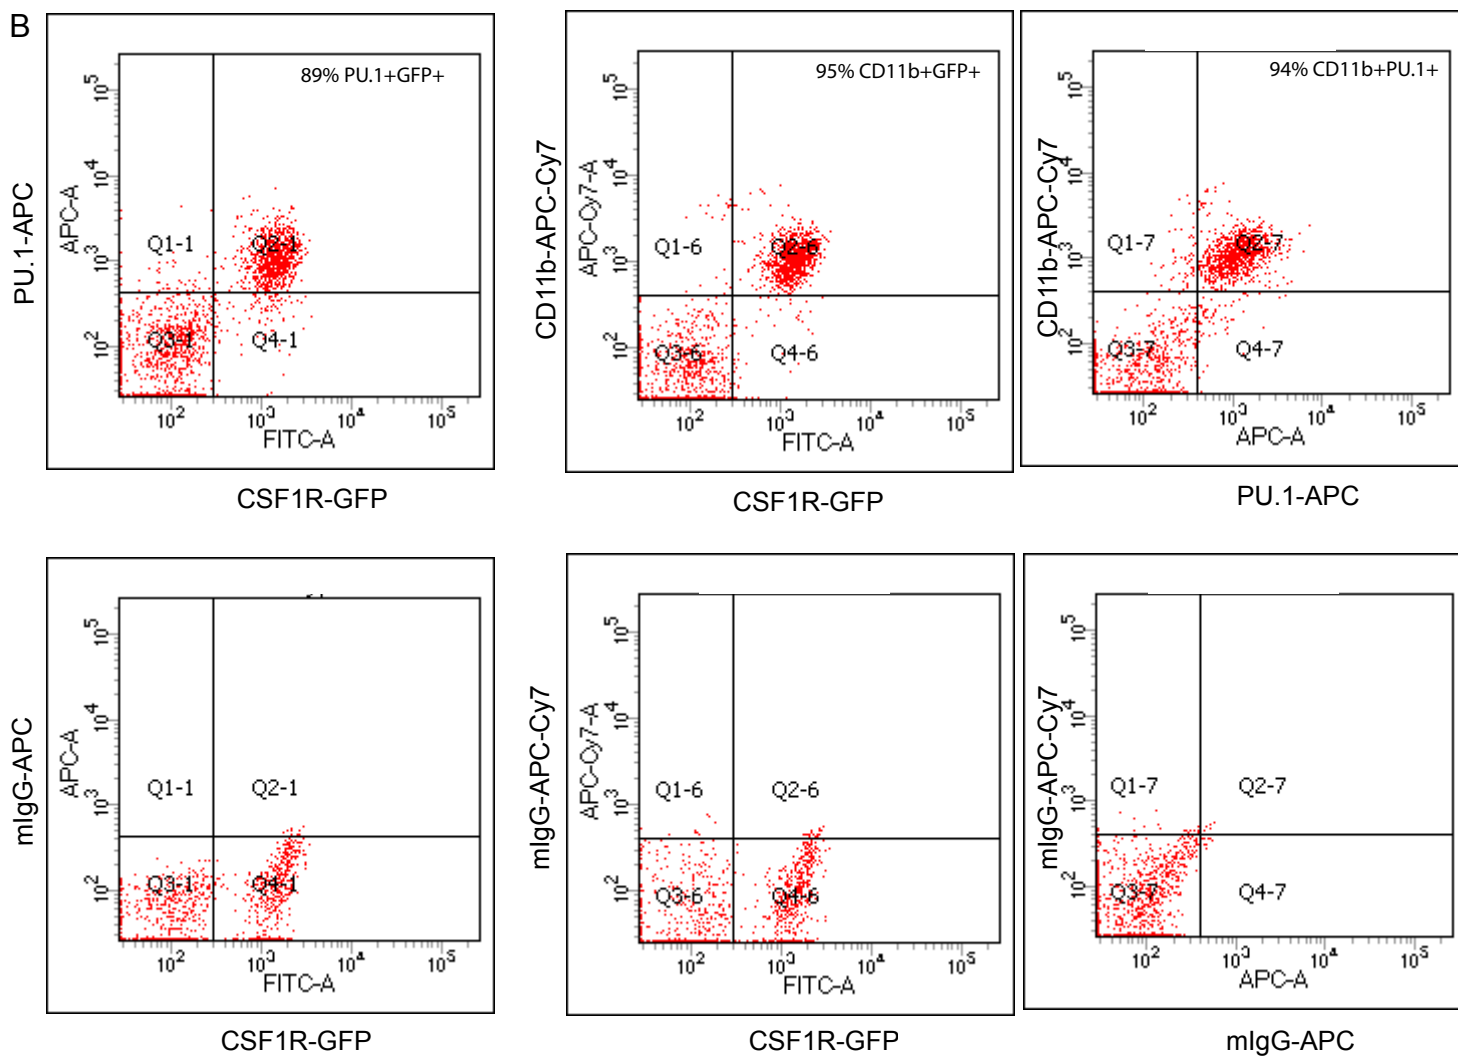

**Supplementary Figure 3. Characterization of transgenic CSF1R-GFP<sup>+</sup> spinal cord microglia.** (A) Schematic of the transgene in MAFIA mice. (B) FACS analysis of dissociated spinal cord microglia from naïve MAFIA mice immunostained for PU.1-APC and CD11b-APC-Cy7 (specific monocytic cell markers) antibodies. The threshold for positivity was based on the background fluorescence in cells incubated with mIgG-APC or mIgG-APC-Cy7 isotype control antibody (lower panels). The percentage of gated cells are noted in the upper right quadrant.

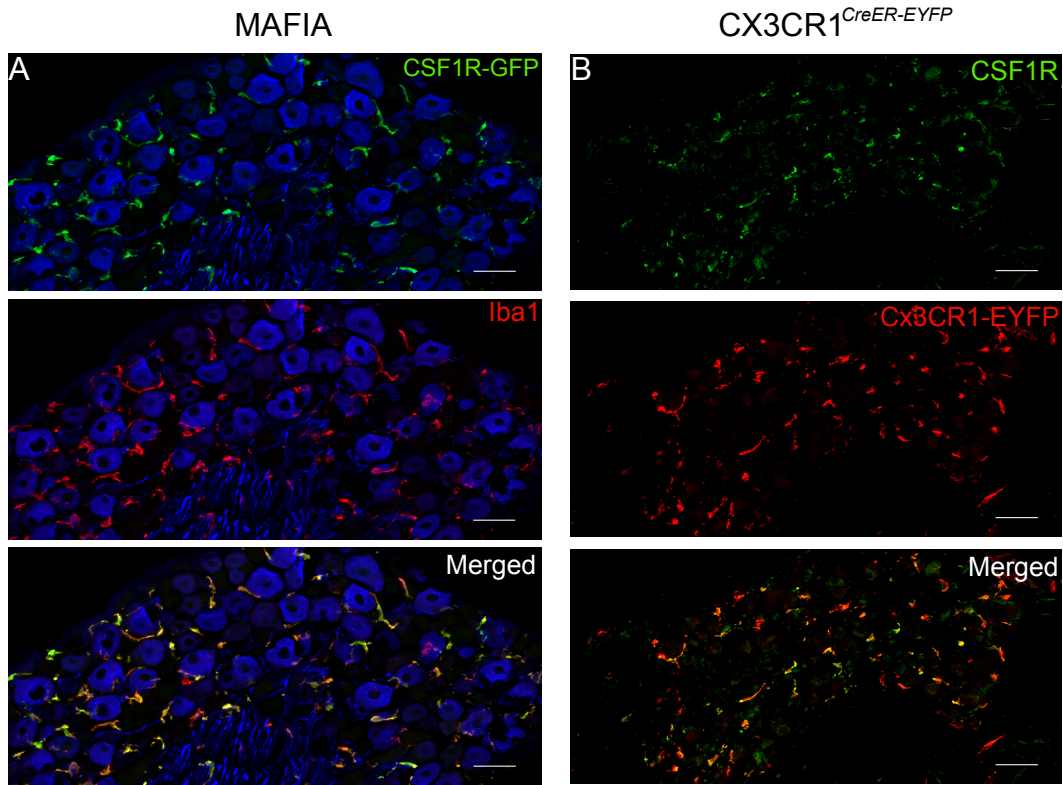



**Supplementary Figure 4. Characterization of DRG macrophages.** (A) Immunoreactive macrophage markers (CSF1R-GFP, green; Iba-1, red), and a neuronal marker (NF200, blue) in the DRG of MAFIA mice. (B) Immunoreactive CSF1R (green) and CX3CR1-EYFP (red) in the DRG of CX3CR1<sup>CreER-EYFP</sup> mice. Scale bar: 50  $\mu$ m.

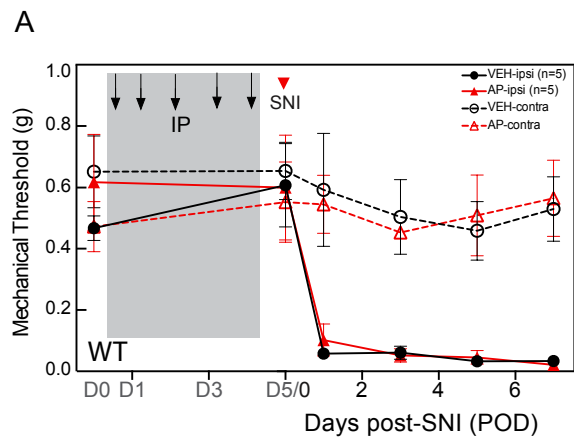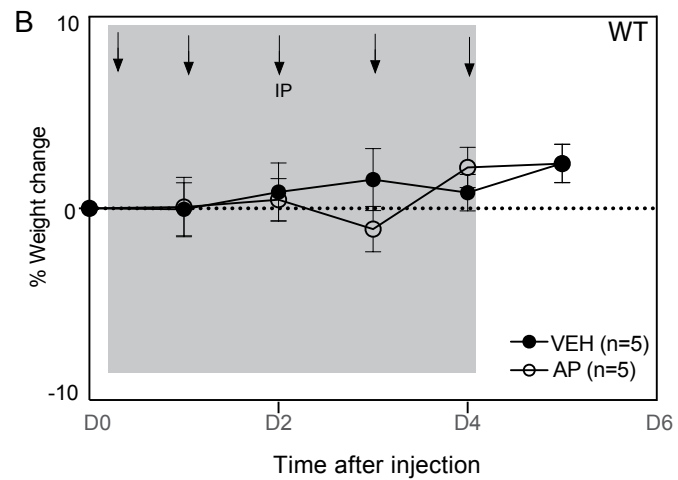

**Supplementary Figure 5. AP20187 does not affect pre- or post- nerve injury mechanical thresholds or weight in WT mice.** (A) Mechanical thresholds before (D0 to D5) and for several days after SNI (POD1-7) following high dose systemic AP ( $10 \text{ mg kg}^{-1}$  x 5 days) or VEH in WT mice (n=5 per group). (B) Body weight change in the treated WT mice (n=5 per group). Grey shading indicates injection days. Data presented as mean  $\pm$  S.E.M. Two-way repeated measures ANOVA with Sidak's correction.

Figure S6

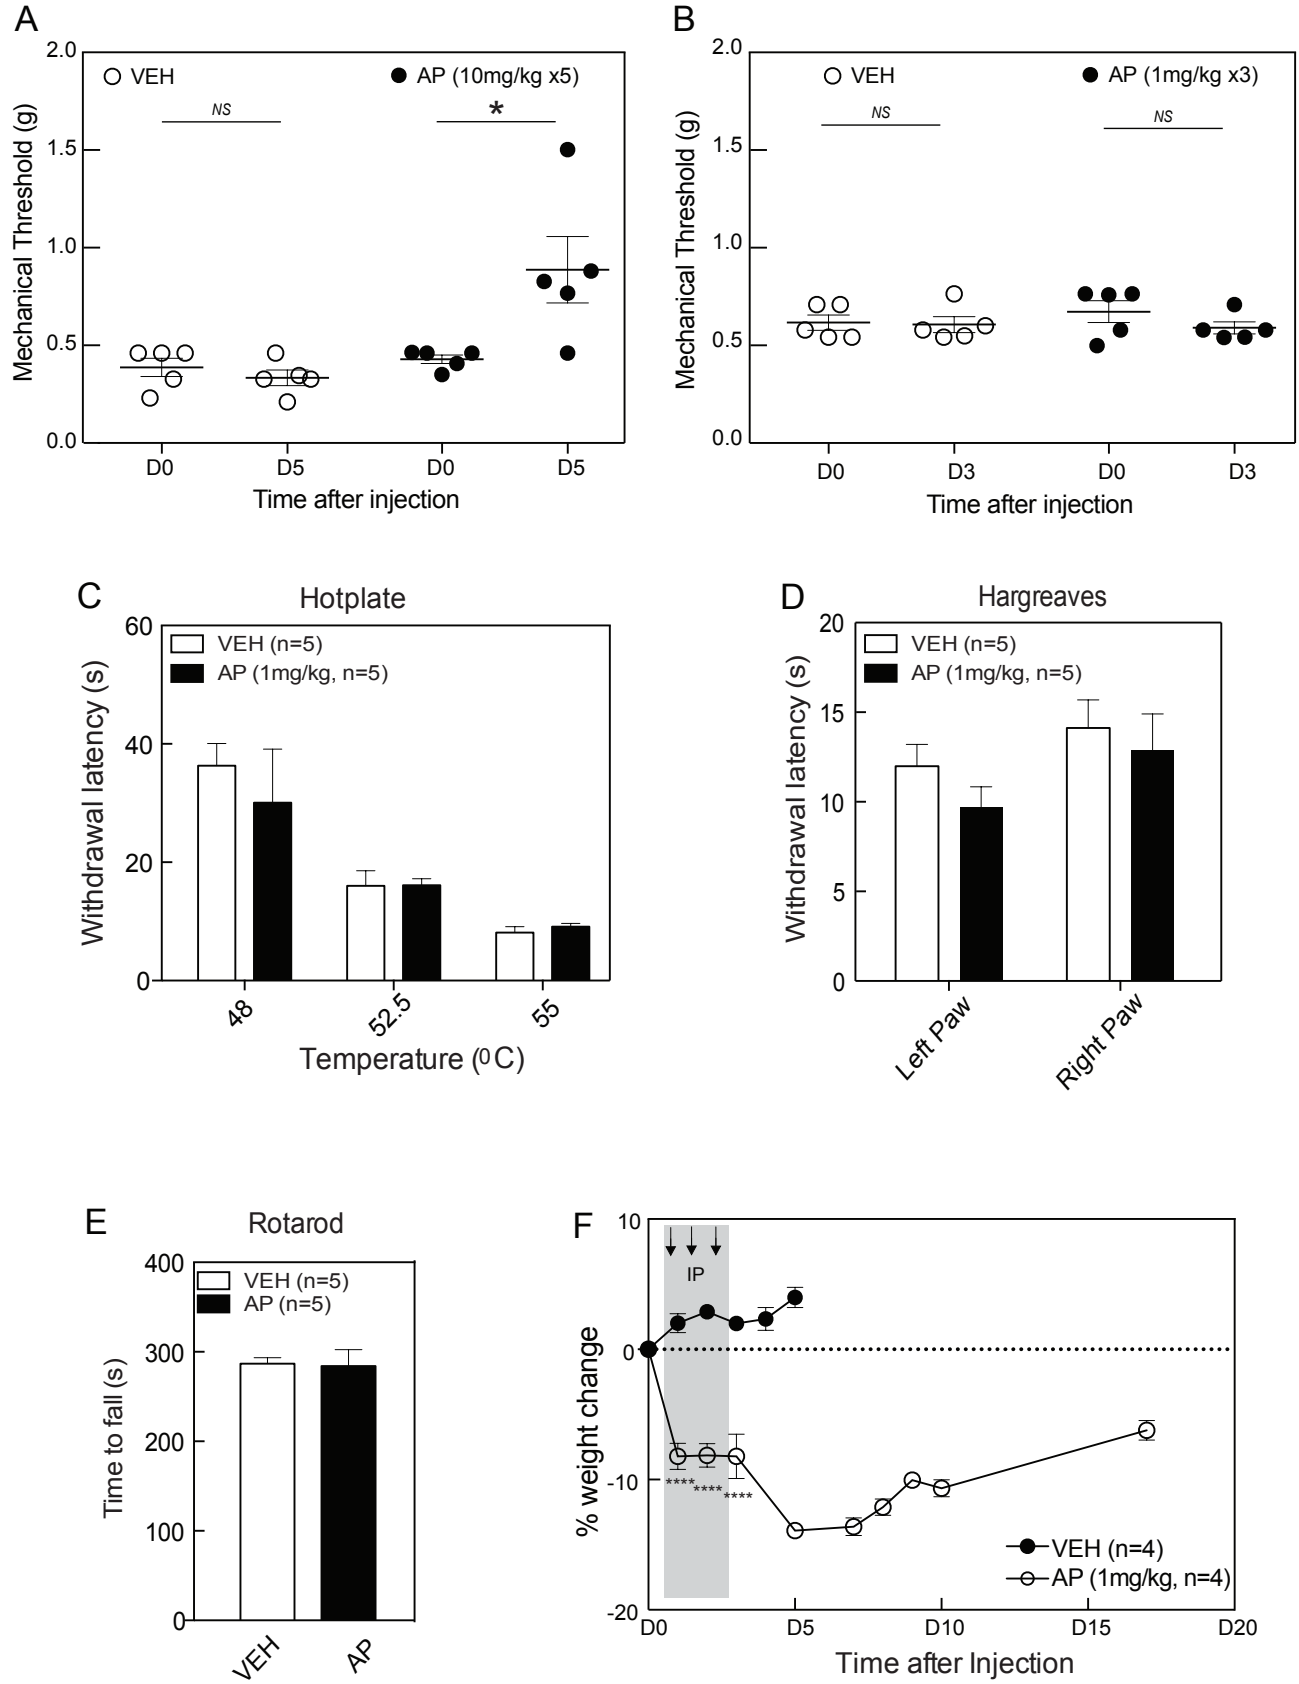

**Supplementary Figure 6: Effect of systemic AP on baseline mechanical and thermal (heat) thresholds and motor coordination in MAFIA mice.** (A) Mechanical threshold before and after 5 days of high dose systemic AP (10 mg kg<sup>-1</sup>) or VEH in MAFIA mice (n=5 per group). (B-E) Mechanical threshold (B), latency to respond in the hot plate test (C), withdrawal latency in the Hargreaves test (D) and motor coordination in the rotarod test (E) after 3 days low dose systemic AP (1.0 mg kg<sup>-1</sup>) or VEH (n=5 per group). (F) Weight change after low dose systemic AP or VEH (n=4 per group). Grey shading indicates injection days. Data presented as mean ± S.E.M. Student's *t*-test in A, B and E. Two-way ANOVA with Sidak's correction in C, D and F. \**P*<0.05, NS, nonsignificant compared to control.

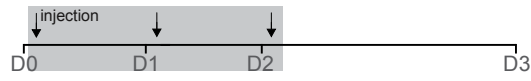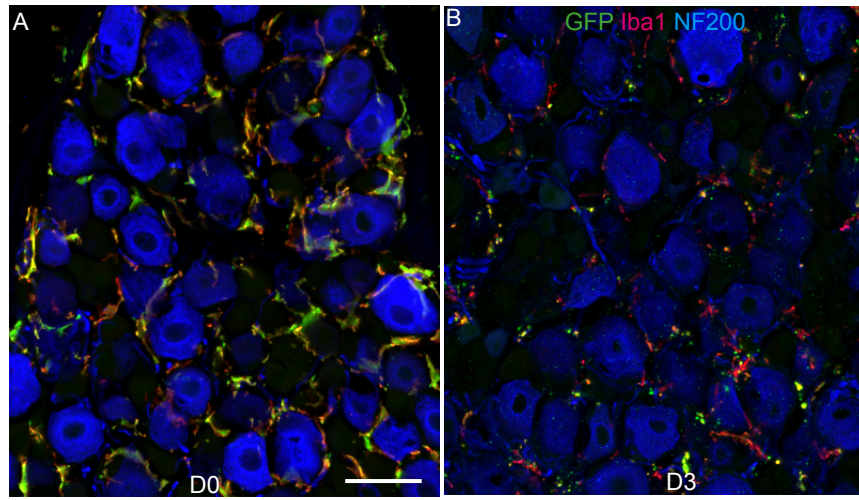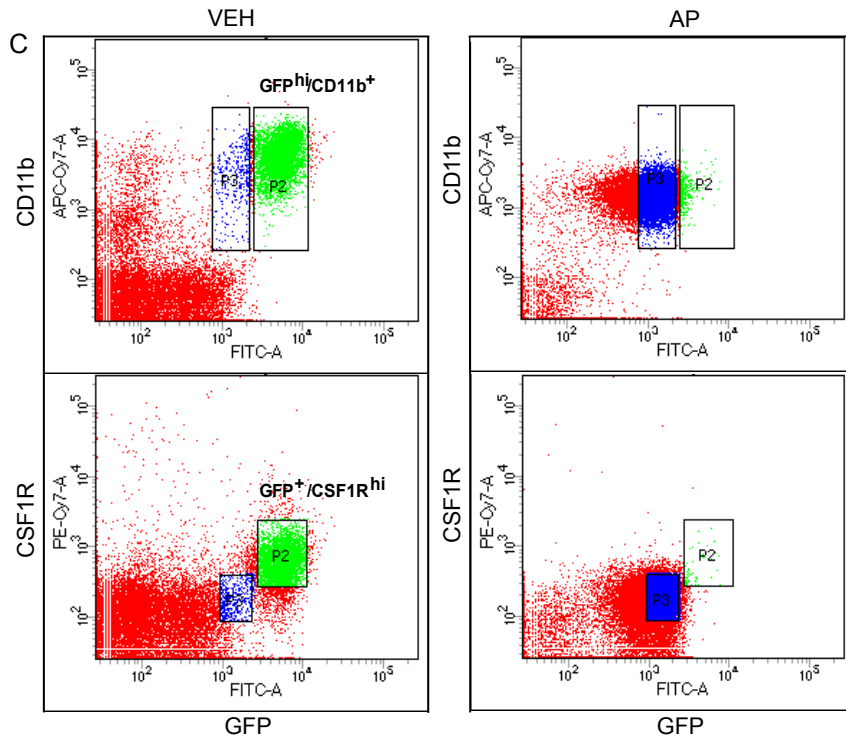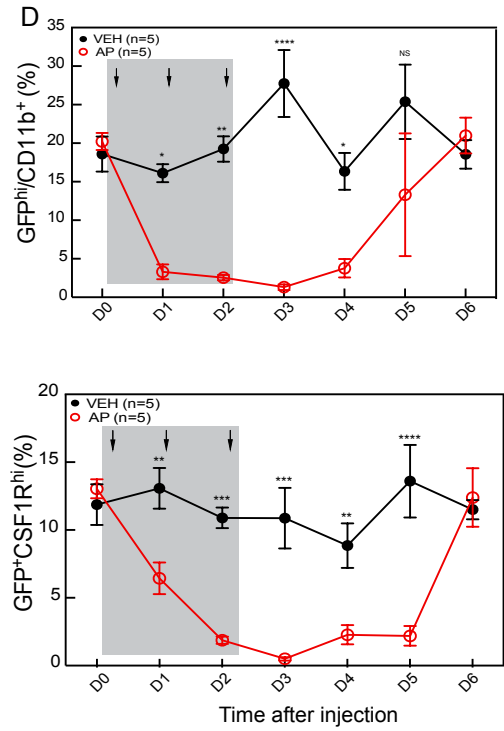

**Supplementary Figure 7. Systemic AP depletes both DRG macrophages and blood monocytes.**

(A) Colocalization of CSF1R<sup>+</sup> (green) and Iba1<sup>+</sup> (red) macrophages in the DRG, before (D0) and 3 days (D3) after systemic AP (3 x 1.0 mg kg<sup>-1</sup>). NF200 (blue) marks large diameter neurons. Scale bar: 50 μm. (C-D) FACS analysis of blood monocytes after 3 daily systemic AP (1.0 mg kg<sup>-1</sup>) or VEH injections. (C) Representative blood monocyte FACS 1 day after the 3<sup>rd</sup> injection (VEH: left; AP: right) with the gated monocyte populations indicated: Green (P2): GFP<sup>hi</sup>CD11b<sup>+</sup> and GFP<sup>+</sup>CSF1R<sup>hi</sup>; Blue (P3): GFP<sup>lo</sup>CD11b<sup>+</sup> and GFP<sup>+</sup>CSF1R<sup>lo</sup>. (D) Percentage of circulating monocytes before and after systemic AP or VEH (n=5 mice per group). Grey shading indicates injection days. Data presented as mean ± S.E.M. Two-way repeated measures ANOVA with Sidak's correction. \**P*<0.05, \*\**P*<0.01, \*\*\**P*<0.001, \*\*\*\**P*<0.0001, NS, nonsignificant compared to control.

Figure S8

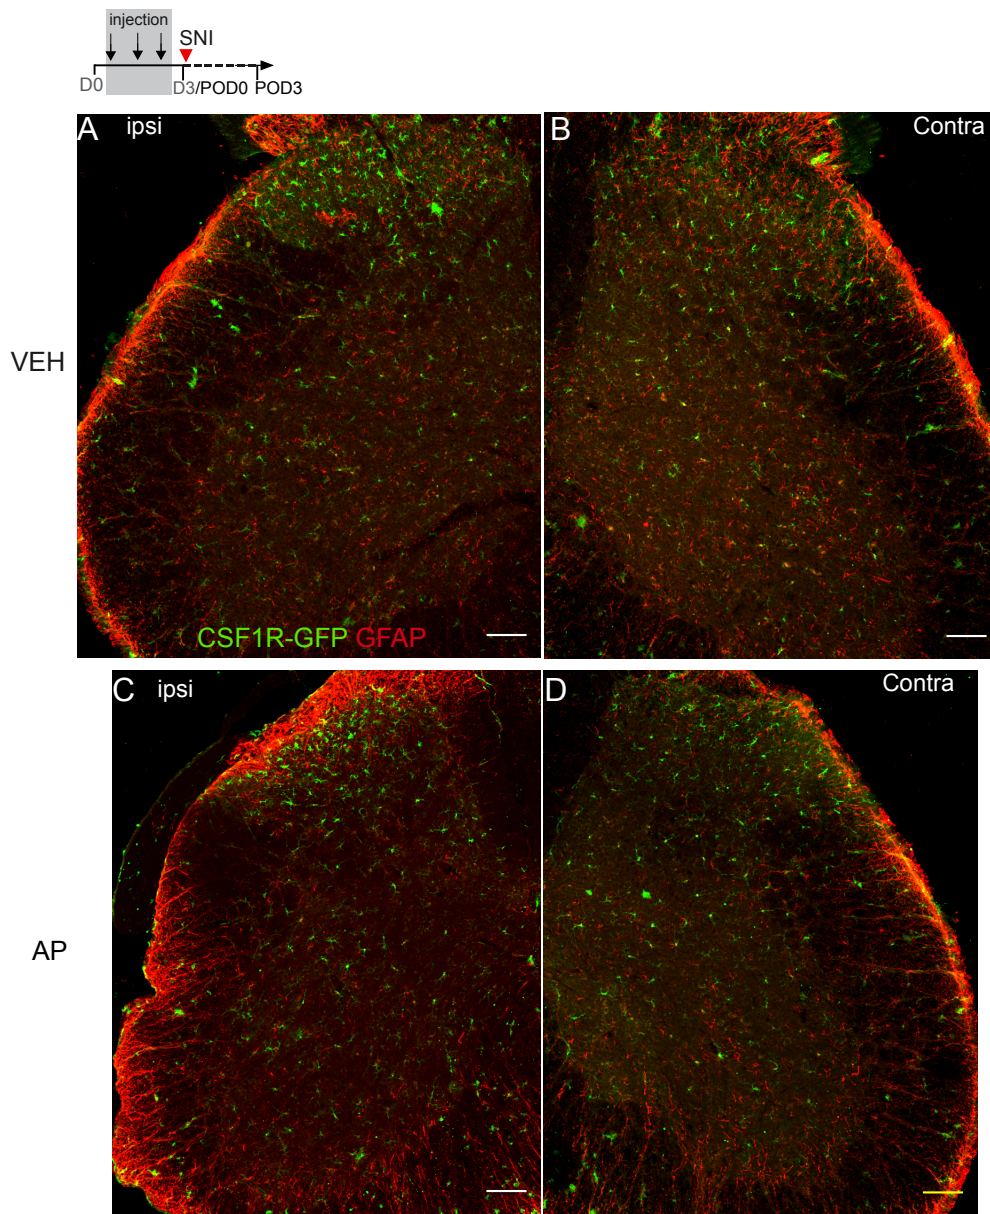



**Supplementary Figure 8: Systemic AP treatment does not influence spinal cord astrocytes.** (A-D) Immunoreactive microglia (CSF1R-GFP, green) and astrocytes (GFAP, red) in the ipsilateral (A, C) and contralateral (B, D) lumbar spinal cord 4 days after SNI (POD4) following systemic AP ( $1 \text{ mg kg}^{-1} \times 3 \text{ days}$ , C-D) or VEH (A-B) in MAFIA mice. Grey shading indicates injection days. Scale bar:  $15 \mu\text{m}$ .

Figure S9

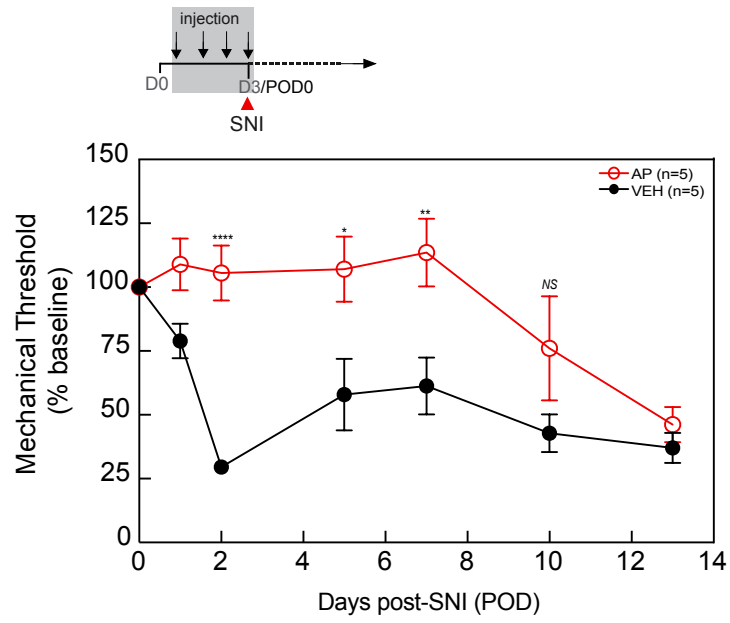

**Supplementary Figure 9. Extension of AP treatment to cover the day of nerve injury did not further delay development of the mechanical hypersensitivity in MAFIA mice.**

Mechanical thresholds after systemic AP (1 mg kg<sup>-1</sup>) or VEH (n=5 per group) before and after SNI. Grey shading indicates injection days. Data presented as mean ± S.E.M. One-way ANOVA with Tukey's correction. \**P*<0.05, \*\**P*<0.01, \*\*\*\**P*<0.0001, *NS*, nonsignificant compared to control.

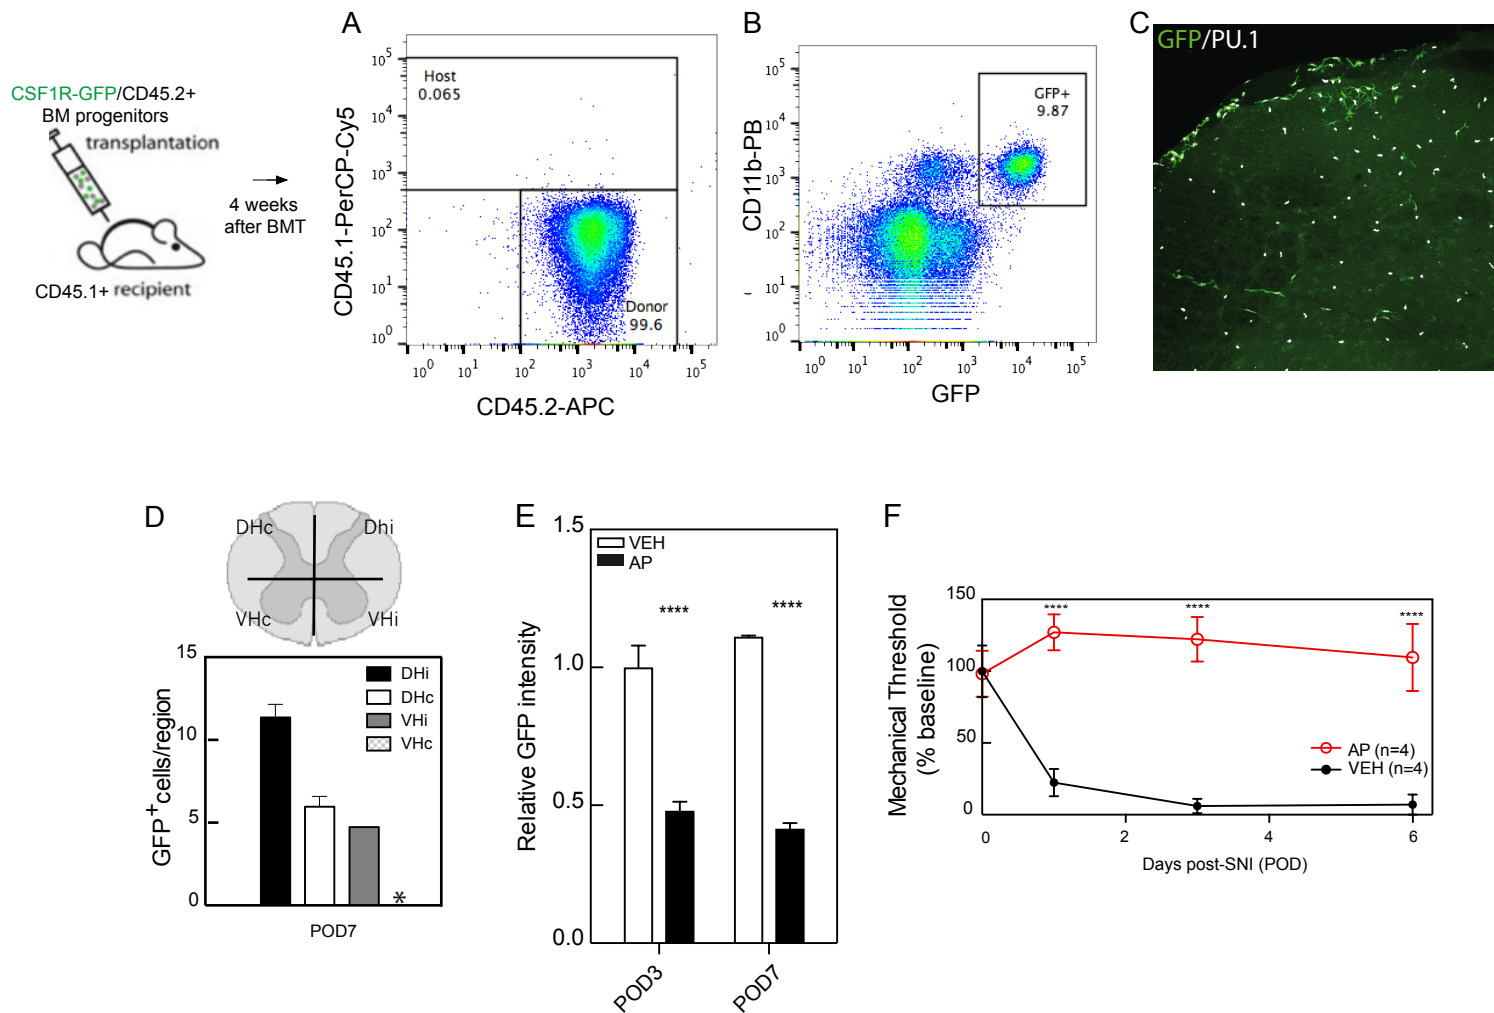

**Supplementary Figure 10: Transplantation of hematopoietic bone marrow (BM) progenitor cells from MAFIA mice into irradiated WT mice does not influence resident spinal cord microglia.** Lineage-depleted BM progenitor donor cells (CD45.2<sup>+</sup>) isolated from MAFIA mice (CSF1R-GFP) were transplanted into lethally irradiated CD45.1<sup>+</sup> WT recipient mice. **(A-B)** Blood was drawn from the tail vein at 4 weeks after BM transplantation and analyzed by FACS for myeloid cell engraftment with an anti-45.1-PerCP-Cy5 (recipient cell marker) and anti-45.2-APC (donor cell marker) antibodies (A) or with an anti-CD11b-PB antibody (B). **(C)** Immunostaining for PU.1 (white, marker of all microglia) and GFP (green, a marker of donor cells) in the ipsilateral lumbar dorsal horn of BM transplanted mice 7 days after SNI (POD7). **(D)** Quantitation of GFP<sup>+</sup> donor microglial cells in the four regions of lumbar spinal cord on POD7 (5-8 sections per mouse; n=4 mice). DHi, ipsilateral dorsal horn; DHc, contralateral dorsal horn; VHi, ipsilateral ventral horn; VHc, contralateral ventral horn. \*, no GFP<sup>+</sup> cells detected. **(E)** GFP intensity in the ipsilateral DRG on POD3 and POD7 in VEH or systemic AP-treated transplanted mice (n=3). **(F)** Mechanical threshold of AP and VEH-treated transplanted mice at different times after SNI (n=4 per group). Data presented as mean  $\pm$  SEM. 2-way ANOVA with Sidak's correction in F and G. \*\*\*\* $P < 0.0001$ .

Figure S11

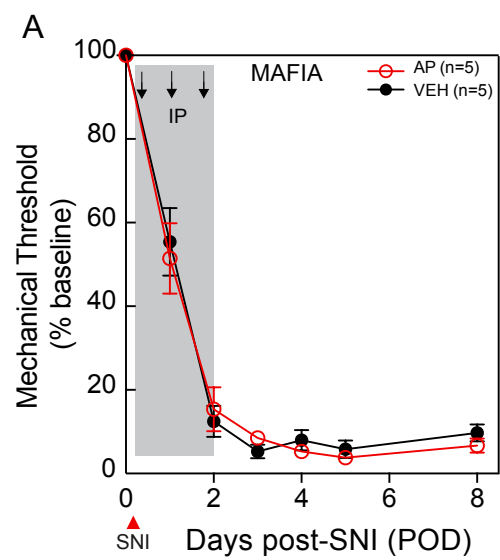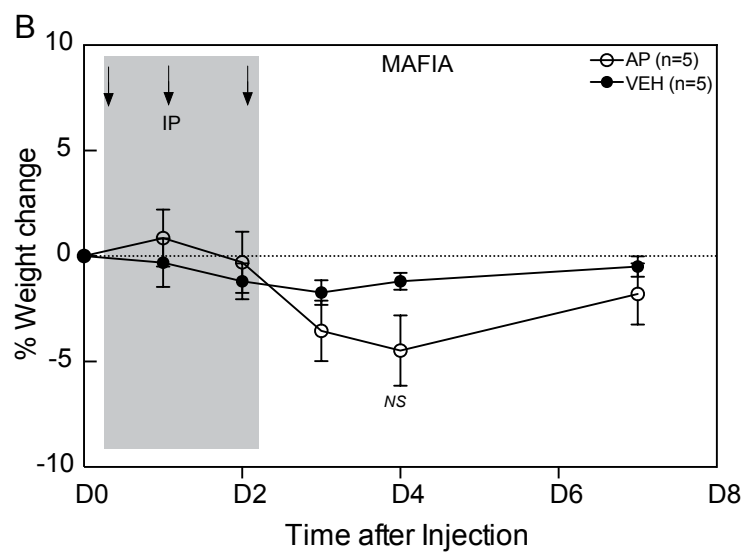

**Supplementary Figure 11. Lack of effect of low-dose systemic AP in MAFIA mice. (A-B)** Neither post-SNI mechanical threshold (A) nor weight (B) was altered by systemic low-dose AP (0.8  $\mu\text{g}$  x 3) or VEH (n=5 per group). Grey shading indicates treatment days. Data presented as mean  $\pm$  SEM; Two-way repeated measures ANOVA with Sidak's correction. *NS*, nonsignificant compared to control.

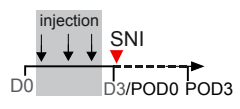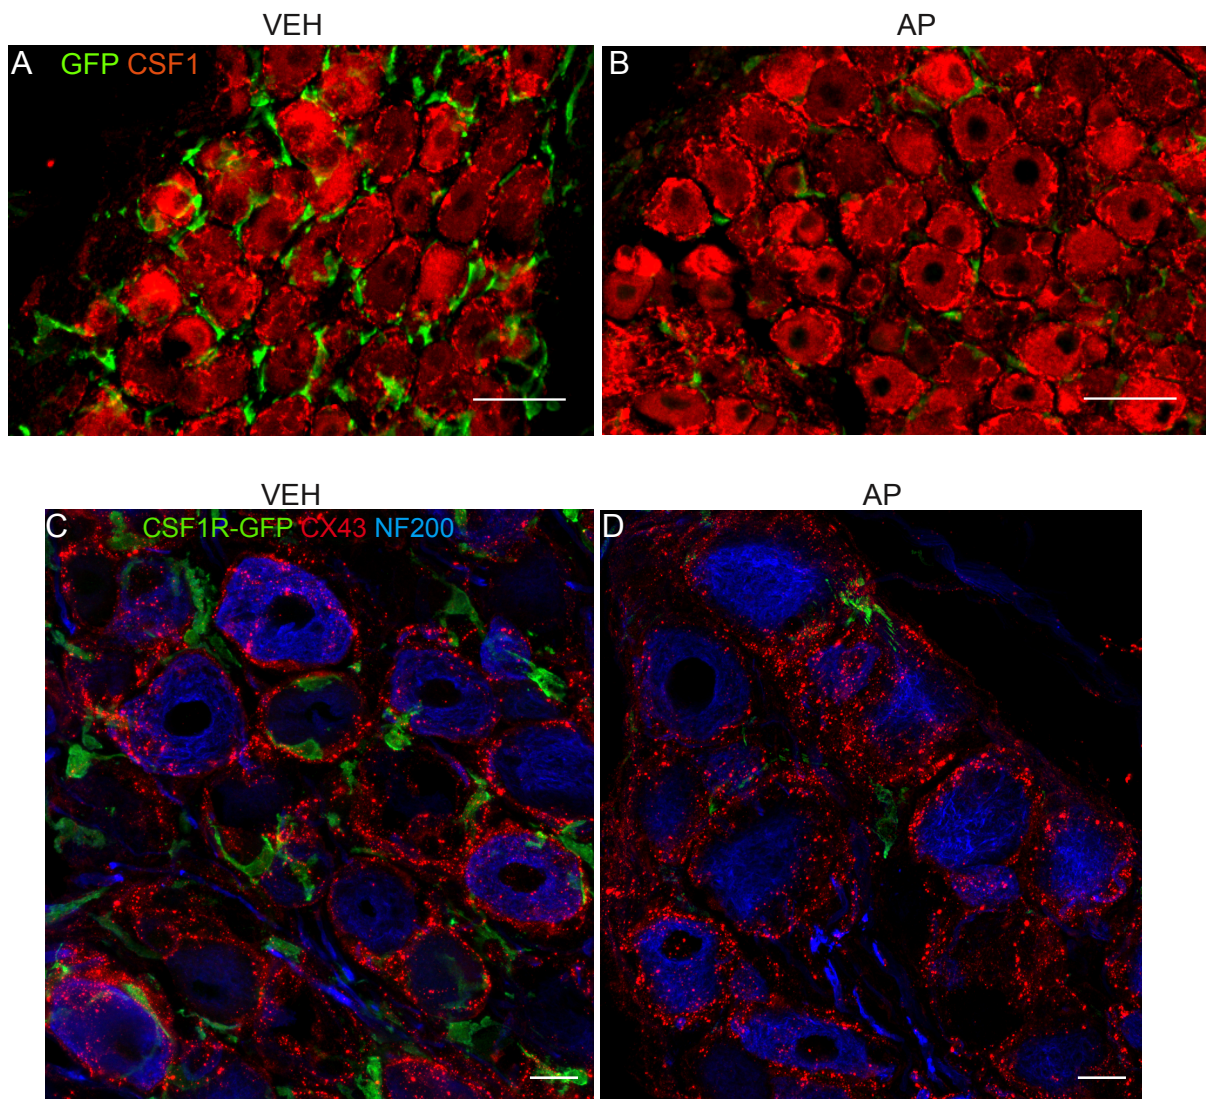



**Supplementary Figure 12. Systemic AP treatment did not prevent nerve injury induction of neuronal CSF1 and did not alter satellite cells after SNI.** Systemic injection of MAFIA mice with  $1.0 \text{ mg kg}^{-1}$  AP or VEH for 3 days, followed by SNI. **(A-D)** Immunostaining for CSF1 (red, A-B) or Connexin 43, a satellite cell marker (red, C-D) in the axotomized DRG on POD3. CSF1R-GFP (green) labels macrophages; NF200 (blue) labels neuronal cell bodies (C-D). Grey shading denotes injection days. Scale bars:  $50 \mu\text{m}$  in A-B;  $15 \mu\text{m}$  in C-D.

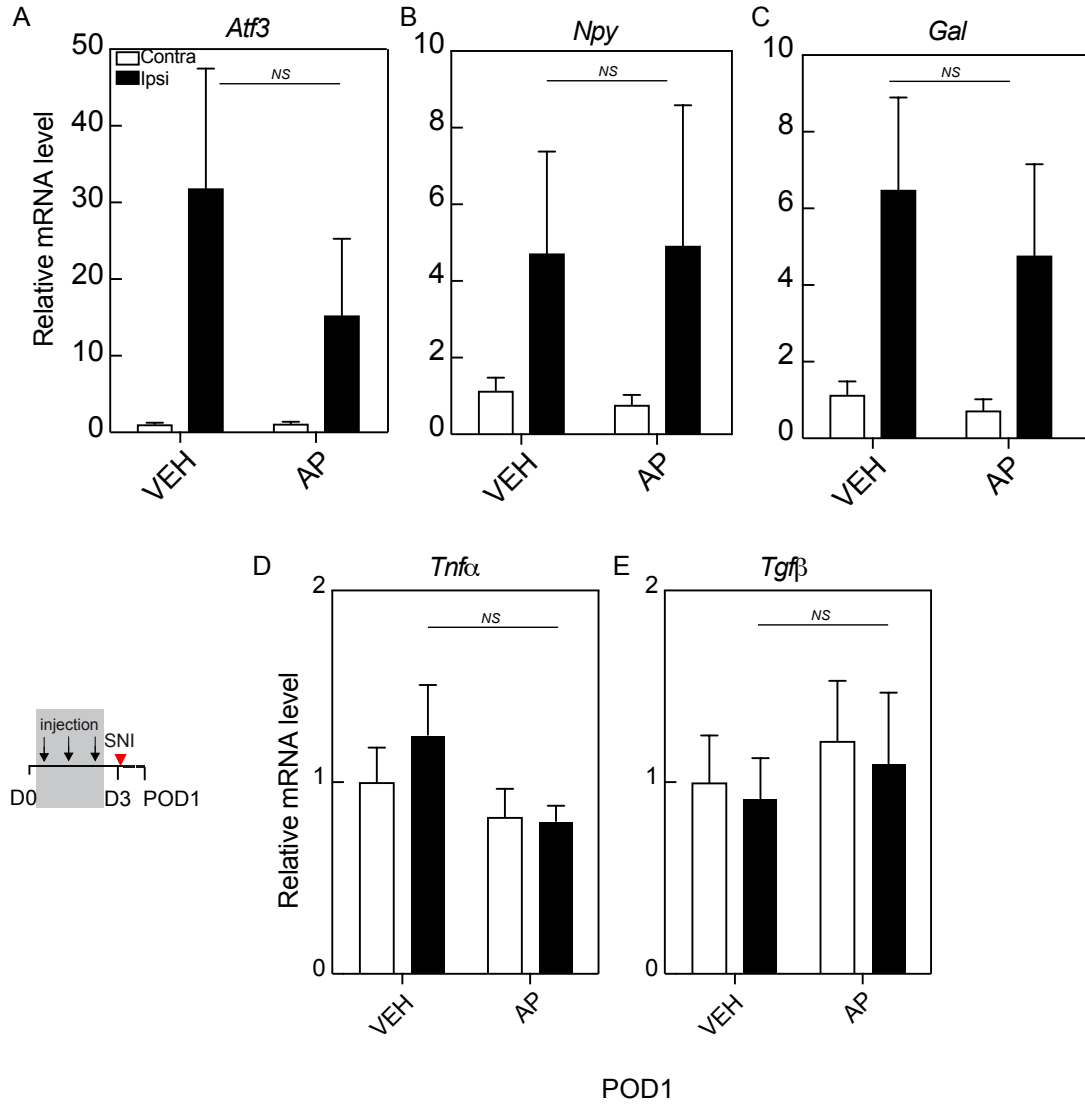

**Supplementary Figure 13. Nerve injury-induced genes in the DRG not altered by systemic AP treatment.** (A-E) Systemic injection of MAFIA mice with 1.0 mg kg<sup>-1</sup> AP or VEH for 3 days, followed by SNI. qPCR of gene expression in L4/5 DRG 1 day after SNI (POD1): (A) activating transcription factor 3 (*Atf3*), (B) neuropeptide Y (*Npy*), (C) galanin (*Gal*), (D) tumor necrosis factor  $\alpha$  (*Tnf\alpha*) and (E) transforming growth factor  $\beta$  (*Tgf\beta*). n=3 per group. Grey shading denotes injection days. Data presented as mean  $\pm$  SEM. Two-way ANOVA; NS, nonsignificant compared to VEH.

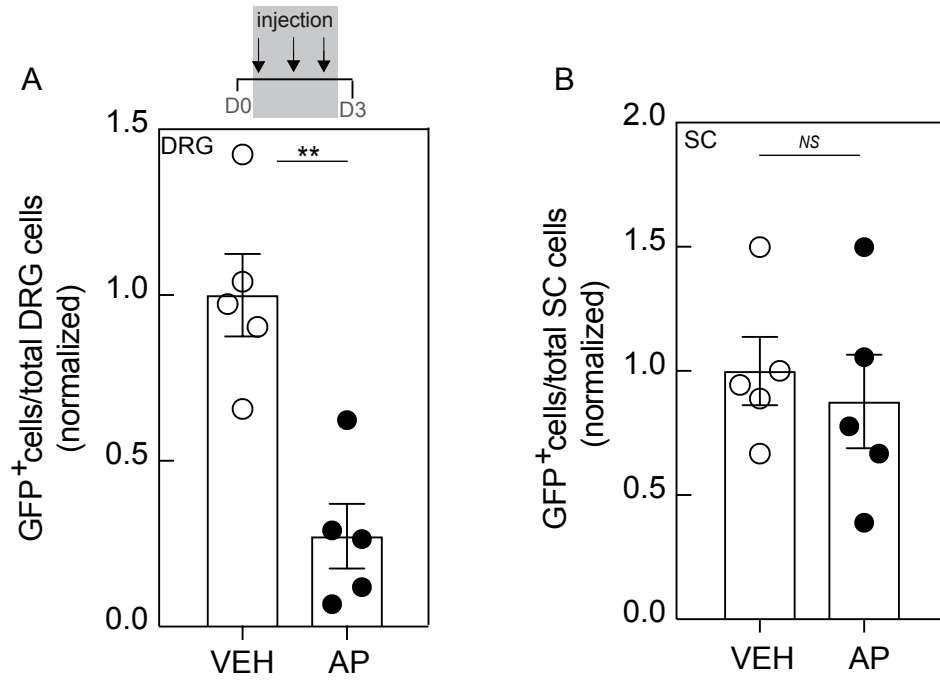

**Supplementary Figure 14. Systemic AP treatment depletes DRG macrophages but does not affect spinal cord (SC) microglia in female MAFIA mice. (A)** FACS analysis of CSF1R-GFP<sup>+</sup> female DRG macrophages 1 day after the 3<sup>rd</sup> AP (1.0 mg kg<sup>-1</sup>) or VEH injection (n=5 per group). **(B)** FACS analysis of CSF1R-GFP<sup>+</sup> female spinal cord microglia after 3-day AP or VEH injections (n=5 per group). Grey shading denotes injection days. Data presented as mean ± SEM. Student's *t*-test in A and B. \*\**P*<0.01, NS, nonsignificant compared to control.
